# Supplementary figures and images for: Identification of Functional Genetic Variants in B4GALNT2 Gene and Their Association with Growth Traits in Goat
Source: Preprints.org preprint supplement (doi:10.20944/preprints202402.1048.v1), 2024-02-19

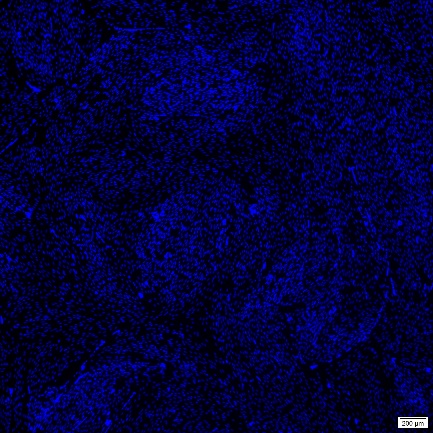

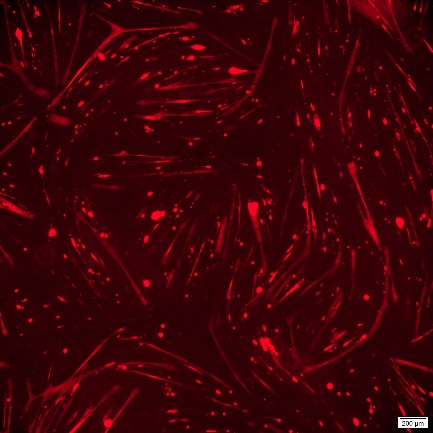

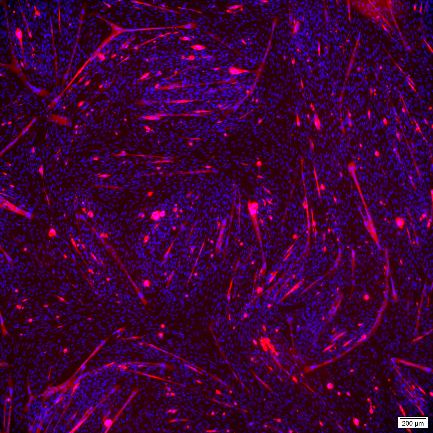

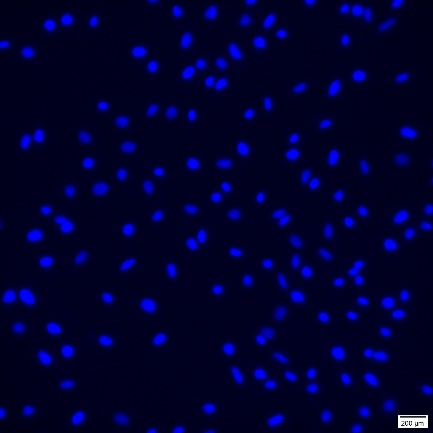

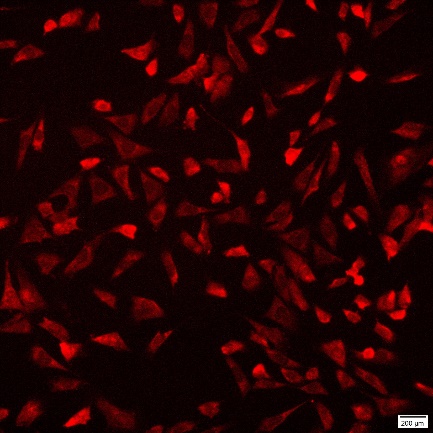

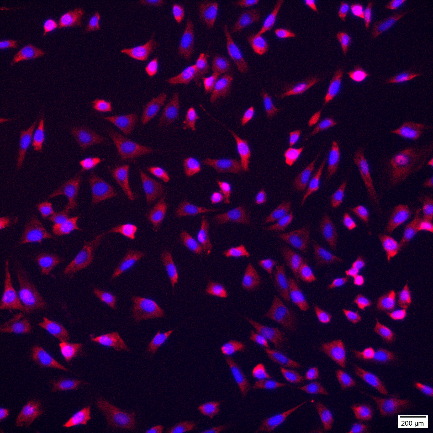


GM

DM

DAPI

Pax 7

Merge

Merge

DAPI

MYHC

Supplement: Supplementary file 1 [file supplementary]
